# Supplementary material for: Bias Implications of Outcome Misclassification in Observational Studies Evaluating Association Between Treatments and All‐Cause or Cardiovascular Mortality Using Administrative Claims
Source: PubMed Central journal article supplement — J Am Heart Assoc. 2020 Aug 26;9(17):e016906. doi: 10.1161/JAHA.120.016906 (PMC7660765; doi:10.1161/jaha.120.016906), 2020-08-26
Supplement: JAH3-9-e016906-s001.pdf [file JAH3-9-e016906-s001.pdf]

# **SUPPLEMENTAL MATERIAL**

**Table S1. Summary level data from trials used as inputs for Monte-Carlo simulations.**

|                                        | EMPAREG-OUTCOME trial |              | PARADIGM trial       |              |
|----------------------------------------|-----------------------|--------------|----------------------|--------------|
|                                        | Empagliflozin         | Placebo      | Sacubitril-Valsartan | Enalapril    |
| Sample size                            | <b>4,687</b>          | <b>2,333</b> | <b>4,187</b>         | <b>4,212</b> |
| Person-years follow up                 | 13,866                | 6,783        | 9,491                | 9,407        |
| All-cause deaths                       | 269                   | 194          | 711                  | 835          |
| CV deaths                              | 172                   | 137          | 558                  | 693          |
| Incidence rate/100 py all-cause deaths | 1.94                  | 2.86         | 7.49                 | 8.88         |
| Incidence rate/100 py CV deaths        | 1.24                  | 2.02         | 5.88                 | 7.37         |

**Table S2. Input parameter ranges used in the Monte Carlo simulations.**

| Outcome assessment approach                                                                                                | False positive rate | Sensitivity                        |                                |           |
|----------------------------------------------------------------------------------------------------------------------------|---------------------|------------------------------------|--------------------------------|-----------|
|                                                                                                                            |                     | Non differential misclassification | Differential misclassification |           |
|                                                                                                                            |                     |                                    | Treatment                      | Reference |
| 1. All-cause all-cause mortality: Master Beneficiary Summary File or hospitalization claims with discharge status of death | 0                   | 0.99207-0.99997                    | -                              | -         |
| 2. In-hospital all cause mortality: Hospitalization claims with discharge status of death                                  | 0                   | 0.2771-0.3371                      | 0.30-0.35                      | 0.25-0.30 |
| 3. All-cause cardiovascular mortality:                                                                                     | 0.2878-0.3616       | 0.5201-0.5383                      | 0.55-0.60                      | 0.50-0.55 |
| 4. In-hospital cardiovascular mortality:                                                                                   | 0.1375-0.1901       | 0.2027-0.2234                      | 0.20-0.25                      | 0.15-0.20 |
